# Supplementary material for: Unplanned hospitalisations in older people: illness trajectories in the last year of life
Source: HighWire-hosted journal article supplement (doi:10.1136/bmjspcare-2020-002778), 2021-04-27

## Supplementary data

Szilcz *et al.* Unplanned hospitalisations in older people: illness trajectories in the last year of life

|                                                                                                                                                                                                                                      |    |
|--------------------------------------------------------------------------------------------------------------------------------------------------------------------------------------------------------------------------------------|----|
| Complete reference list .....                                                                                                                                                                                                        | 3  |
| eTable 1. Data sources .....                                                                                                                                                                                                         | 7  |
| eTable 2. Classification of causes of death into illness trajectories .....                                                                                                                                                          | 8  |
| eTable 3. Details of diagnosis codes and drugs used to detect chronic conditions .....                                                                                                                                               | 9  |
| eTable 4. Diagnosis codes and weights used to calculate the Hospital Frailty Risk score[27].....                                                                                                                                     | 13 |
| eTable 5. Categorization of levels of education.....                                                                                                                                                                                 | 16 |
| eTable 6. Details of diagnosis codes used to identify potentially unexpected causes of death in older adults .....                                                                                                                   | 17 |
| eTable 7. RECORD Checklist .....                                                                                                                                                                                                     | 18 |
| eTable 8. Fifteen most common main underlying cause of deaths of the decedents of sudden death illness trajectory (N=5700) .....                                                                                                     | 21 |
| eTable 9. Incidence rate of unplanned hospitalisation by week, stratified by illness trajectory, sex- and age-standardised (direct standardization).....                                                                             | 22 |
| eTable 10. Proportion of decedents with $\geq 1$ unplanned hospitalisation during each of the 52 weeks before death, stratified by illness trajectory .....                                                                          | 24 |
| eTable 11. Frequency of trajectories distribution after removing decedents with potentially unexpected cause of death compared to the study population .....                                                                         | 26 |
| eTable 12. Incidence rate of unplanned hospitalisation during the last year of life by illness trajectory and rate ratios compared to the overall population, decedents with potentially unexpected cause of death are removed ..... | 27 |
| eTable 13. Crude Incidence rate of unplanned hospitalisation by week, stratified by illness trajectories in the last year of life, decedents with potentially unexpected cause of death are removed .....                            | 28 |
| eTable 14. Zero-inflated Poisson versus Poisson models' incidence rate ratios of unplanned hospitalisation by illness trajectory compared to the overall population .....                                                            | 30 |
| eFigure 1. Illustration of the study design.....                                                                                                                                                                                     | 31 |

|                                                                                                                                                                                                           |    |
|-----------------------------------------------------------------------------------------------------------------------------------------------------------------------------------------------------------|----|
| eFigure 2. Normal quintiles-quintiles plot of the number of unplanned admission throughout the entire last year of life .....                                                                             | 32 |
| eFigure 3. Fitted probabilities under Zero-inflated Poisson and Poisson models plotted against each other .....                                                                                           | 33 |
| eFigure 4. Flowchart diagram .....                                                                                                                                                                        | 34 |
| eFigure 5. Incidence rate of unplanned hospitalisation by week, stratified by illness trajectories in the last year of life, sex- and age-standardised (direct standardization). .....                    | 35 |
| eFigure 6. Crude Incidence rate of unplanned hospitalisation by week, stratified by illness trajectories in the last year of life, decedents with potentially unexpected cause of death are removed ..... | 36 |

### Complete reference list

- 1 Woodman C, Baillie J, Sivell S. The preferences and perspectives of family caregivers towards place of care for their relatives at the end-of-life. A systematic review and thematic synthesis of the qualitative evidence. *BMJ Support Palliat Care* 2016;**6**:418–29. doi:10.1136/bmjspcare-2014-000794
- 2 Higginson IJ, Sen-Gupta GJ. Place of care in advanced cancer: a qualitative systematic literature review of patient preferences. *J Palliat Med* 2000;**3**:287–300. doi:10.1089/jpm.2000.3.287
- 3 Van den Block L, Pivodic L, Pardon K, *et al.* Transitions between health care settings in the final three months of life in four EU countries. *Eur J Public Heal* 2015;**25**:569–75. doi:10.1093/eurpub/ckv039
- 4 Gill TM, Gahbauer EA, Han L, *et al.* The role of intervening hospital admissions on trajectories of disability in the last year of life: prospective cohort study of older people. *Bmj* 2015;**350**:h2361. doi:10.1136/bmj.h2361
- 5 Teno JM, Gozalo P, Trivedi AN, *et al.* Site of Death, Place of Care, and Health Care Transitions Among US Medicare Beneficiaries, 2000–2015. *Jama* 2018;**320**:264–71. doi:10.1001/jama.2018.8981
- 6 Van den Block L, Onwuteaka-Philipsen B, Meeussen K, *et al.* Nationwide continuous monitoring of end-of-life care via representative networks of general practitioners in Europe. *BMC Fam Pr* 2013;**14**:73. doi:10.1186/1471-2296-14-73
- 7 Pivodic L, Pardon K, Miccinesi G, *et al.* Hospitalisations at the end of life in four European countries: a population-based study via epidemiological surveillance networks. *J Epidemiol Community Heal* 2016;**70**:430–6. doi:10.1136/jech-2015-206073
- 8 Ko W, Deliens L, Miccinesi G, *et al.* Care provided and care setting transitions in the last three months of life of cancer patients: a nationwide monitoring study in four European countries. *BMC Cancer* 2014;**14**:960. doi:10.1186/1471-2407-14-960
- 9 Elmstedt S, Mogensen H, Hallmans DE, *et al.* Cancer patients hospitalised in the last week of life risk insufficient care quality - a population-based study from the Swedish Register of Palliative Care. *Acta Oncol* 2019;**58**:432–8. doi:10.1080/0284186x.2018.1556802
- 10 Wright AA, Keating NL, Ayanian JZ, *et al.* Family Perspectives on Aggressive Cancer Care Near the End of Life. *Jama* 2016;**315**:284–92. doi:10.1001/jama.2015.18604
- 11 Hanratty B, Lowson E, Grande G, *et al.* *Transitions at the end of life for older adults – patient, carer and professional perspectives: a mixed-methods study*. Southampton (UK): NIHR Journals Library; 2014 Jun. (Health Services and Delivery Research, No. 2.17.) 2014.
- 12 Coleman EA. Falling through the cracks: challenges and opportunities for improving transitional care for persons with continuous complex care needs. *J Am Geriatr Soc* 2003;**51**:549–55. doi:10.1046/j.1532-5415.2003.51185.x
- 13 Sepúlveda C, Marlin A, Yoshida T, *et al.* Palliative Care: the World Health Organization's

- global perspective. *J Pain Symptom Manag* 2002;**24**:91–6. doi:10.1016/s0885-3924(02)00440-2
- 14 Gruneir A, Silver MJ, Rochon PA. Emergency department use by older adults: a literature review on trends, appropriateness, and consequences of unmet health care needs. *Med Care Res Rev* 2011;**68**:131–55. doi:10.1177/1077558710379422
- 15 Murray SA, Kendall M, Boyd K, *et al.* Illness trajectories and palliative care. *Bmj* 2005;**330**:1007–11. doi:10.1136/bmj.330.7498.1007
- 16 Lynn J, Adamson DM. Living Well at the End of Life: Adapting Health Care to Serious Chronic Illness in Old Age. *St Monica, CA RAND Corp* 2003 2003.
- 17 Ludvigsson JF, Otterblad-Olausson P, Pettersson BU, *et al.* The Swedish personal identity number: possibilities and pitfalls in healthcare and medical research. *Eur J Epidemiol* 2009;**24**:659–67. doi:10.1007/s10654-009-9350-y
- 18 Lunney JR, Lynn J, Foley DJ, *et al.* Patterns of functional decline at the end of life. *Jama* 2003;**289**:2387–92. doi:10.1001/jama.289.18.2387
- 19 Gill TM, Gahbauer EA, Han L, *et al.* Trajectories of disability in the last year of life. *N Engl J Med* 2010;**362**:1173–80. doi:10.1056/NEJMoa0909087
- 20 Morin L, Vetrano DL, Rizzuto D, *et al.* Choosing Wisely? Measuring the Burden of Medications in Older Adults near the End of Life: Nationwide, Longitudinal Cohort Study. *Am J Med* 2017;**130**:927–936.e9. doi:10.1016/j.amjmed.2017.02.028
- 21 Chaudhry SI, Murphy TE, Gahbauer E, *et al.* Restricting symptoms in the last year of life: a prospective cohort study. *JAMA Intern Med* 2013;**173**:1534–40. doi:10.1001/jamainternmed.2013.8732
- 22 Lunney JR, Lynn J, Hogan C. Profiles of older medicare decedents. *J Am Geriatr Soc* 2002;**50**:1108–12. doi:10.1046/j.1532-5415.2002.50268.x
- 23 Stolz E, Gill TM, Mayerl H, *et al.* Trajectories of late-life disability vary by the condition leading to death. *J Gerontol A Biol Sci Med Sci* Published Online First: 2020. doi:10.1093/gerona/glaa234
- 24 Ludvigsson JF, Andersson E, Ekbom A, *et al.* External review and validation of the Swedish national inpatient register. *BMC Public Health* 2011;**11**:450. doi:10.1186/1471-2458-11-450
- 25 Platt RW, Hutcheon JA, Suissa S. Immortal Time Bias in Epidemiology. *Curr Epidemiol Reports* 2019;**6**:23–7. doi:10.1007/s40471-019-0180-5
- 26 Calderon-Larranaga A, Vetrano DL, Onder G, *et al.* Assessing and Measuring Chronic Multimorbidity in the Older Population: A Proposal for Its Operationalization. *J Gerontol A Biol Sci Med Sci* 2017;**72**:1417–23. doi:10.1093/gerona/glw233
- 27 Gilbert T, Neuburger J, Kraindler J, *et al.* Development and validation of a Hospital Frailty Risk Score focusing on older people in acute care settings using electronic hospital records: an observational study. *Lancet* 2018;**391**:1775–82. doi:10.1016/s0140-6736(18)30668-8

- 28 Halldén K. *The Swedish educational system and classifying education using the ISCED-97*. The intern. Mannheim: : University of Mannheim 2008.
- 29 Morin L, Johnell K, Laroche ML, *et al*. The epidemiology of polypharmacy in older adults: register-based prospective cohort study. *Clin Epidemiol* 2018;**10**:289–98. doi:10.2147/clep.S153458
- 30 Wilson P. The misuse of the Vuong test for non-nested models to test for zero-inflation. *Econ Lett* 2015;**127**:51–3. <https://econpapers.repec.org/RePEc:eee:ecolet:v:127:y:2015:i:c:p:51-53>
- 31 Morin L, Todd A, Barclay S, *et al*. Preventive drugs in the last year of life of older adults with cancer: Is there room for deprescribing? *Cancer* 2019;**125**:2309–17. doi:10.1002/cncr.32044
- 32 SAS Institute. The SAS system for Windows. Release 9.4. 2011.
- 33 R Core Team. R: A language and environment for statistical computing. R Foundation for Statistical Computing. 2019.
- 34 Benchimol EI, Smeeth L, Guttman A, *et al*. The REporting of studies Conducted using Observational Routinely-collected health Data (RECORD) statement. *PLoS Med* 2015;**12**:e1001885. doi:10.1371/journal.pmed.1001885
- 35 Dalrymple U, Makwana A, Pring A, *et al*. Older people's hospital admissions in the last year of life. Public Health England: 2020. <https://www.gov.uk/government/publications/older-peoples-hospital-admissions-in-the-last-year-of-life/older-peoples-hospital-admissions-in-the-last-year-of-life>
- 36 Martinsson L, Lundström S, Sundelöf J. Quality of end-of-life care in patients with dementia compared to patients with cancer: A population-based register study. *PLoS One* 2018;**13**:e0201051. doi:10.1371/journal.pone.0201051
- 37 Davies N, Maio L, van Riet Paap J, *et al*. Quality palliative care for cancer and dementia in five European countries: some common challenges. *Aging Ment Heal* 2014;**18**:400–10. doi:10.1080/13607863.2013.843157
- 38 Bamford C, Lee R, McLellan E, *et al*. What enables good end of life care for people with dementia? A multi-method qualitative study with key stakeholders. *BMC Geriatr* 2018;**18**:302. doi:10.1186/s12877-018-0983-0
- 39 Ackermann RJ. Nursing home practice. Strategies to manage most acute and chronic illnesses without hospitalization. *Geriatrics* 2001;**56**:37, 40, 43-4 passim.
- 40 Westerlund C, Tishelman C, Benkel I, *et al*. Public awareness of palliative care in Sweden. *Scand J Public Heal* 2018;**46**:478–87. doi:10.1177/1403494817751329
- 41 Boockvar K, Fishman E, Kyriacou CK, *et al*. Adverse events due to discontinuations in drug use and dose changes in patients transferred between acute and long-term care facilities. *Arch Intern Med* 2004;**164**:545–50. doi:10.1001/archinte.164.5.545
- 42 Yoo JW, Nakagawa S, Kim S. Integrative palliative care, advance directives, and hospital outcomes of critically ill older adults. *Am J Hosp Palliat Care* 2012;**29**:655–62.

doi:10.1177/1049909111435813

- 43 Rocker G, Downar J, Morrison RS. Palliative care for chronic illness: driving change. *Cmaj* 2016;**188**:E493-e498. doi:10.1503/cmaj.151454
- 44 Detering KM, Hancock AD, Reade MC, *et al.* The impact of advance care planning on end of life care in elderly patients: randomised controlled trial. *Bmj* 2010;**340**:c1345. doi:10.1136/bmj.c1345
- 45 Murray SA, Kendall M, Mitchell G, *et al.* Palliative care from diagnosis to death. *Bmj* 2017;**356**:j878. doi:10.1136/bmj.j878
- 46 ElMokhallati Y, Bradley SH, Chapman E, *et al.* Identification of patients with potential palliative care needs: A systematic review of screening tools in primary care. *Palliat Med* 2020;**34**:989–1005. doi:10.1177/0269216320929552
- 47 Bach PB, Schrag D, Begg CB. Resurrecting treatment histories of dead patients: a study design that should be laid to rest. *Jama* 2004;**292**:2765–70. doi:10.1001/jama.292.22.2765
- 48 Ludvigsson JF, Almqvist C, Bonamy AK, *et al.* Registers of the Swedish total population and their use in medical research. *Eur J Epidemiol* 2016;**31**:125–36. doi:10.1007/s10654-016-0117-y
- 49 Brooke HL, Talbäck M, Hörnblad J, *et al.* The Swedish cause of death register. *Eur J Epidemiol* 2017;**32**:765–73. doi:10.1007/s10654-017-0316-1
- 50 Wallerstedt SM, Wettermark B, Hoffmann M. The First Decade with the Swedish Prescribed Drug Register - A Systematic Review of the Output in the Scientific Literature. *Basic Clin Pharmacol Toxicol* 2016;**119**:464–9. doi:10.1111/bcpt.12613
- 51 Wettermark B, Hammar N, Fored CM, *et al.* The new Swedish Prescribed Drug Register--opportunities for pharmacoepidemiological research and experience from the first six months. *Pharmacoepidemiol Drug Saf* 2007;**16**:726–35. doi:10.1002/pds.1294

*eTable 1. Data sources*

| Register                                | Register holder                      | Start                                                                                             | Completeness                                                                                                                                                                             | Geographical coverage | Content                                                                                                                                                                                                                          | Externally validated                                                                         |
|-----------------------------------------|--------------------------------------|---------------------------------------------------------------------------------------------------|------------------------------------------------------------------------------------------------------------------------------------------------------------------------------------------|-----------------------|----------------------------------------------------------------------------------------------------------------------------------------------------------------------------------------------------------------------------------|----------------------------------------------------------------------------------------------|
| Total Population Register[48]           | Statistics Sweden                    | 1968                                                                                              | The over-coverage has been estimated to 0.1 % for Nordic citizens but substantially higher for individuals born outside the Nordic countries (potentially 4–8 %)                         | Nationwide            | Sex, date of birth, country of birth, municipality of residence, living arrangement, civil status, year of first and last immigration, year of last emigration                                                                   | Yes                                                                                          |
| National Cause Of Death Register[49]    | National Board of Health and Welfare | Complete since 1952                                                                               | 99% of all deaths are documented with an underlying cause of death                                                                                                                       | Nationwide            | Sex, date of birth, underlying and contributing causes of death (ICD-10), place of death, civil status                                                                                                                           | Yes                                                                                          |
| National Patient Register[24]           | National Board of Health and Welfare | Inpatient care coverage complete since 1987<br>Specialised outpatient care since 2001             | 99% of all somatic and psychiatric hospital discharges are registered.<br>Outpatient diagnoses coverage lower than inpatient data but above 80%                                          | Nationwide            | Sex, age, date of admission and discharge, planned/unplanned admission, main diagnosis, secondary diagnoses, injuries, medical or surgical procedures, department of admission, provenance, destination.                         | The inpatient register part has an overall positive predictive value of diagnosis of 85%-95% |
| Swedish Prescribed Drug Register[50,51] | National Board of Health and Welfare | July 2005                                                                                         | 85% of all sold defined daily doses (DDDs) are covered by the register<br>The remaining 15% are Over-the-counter medications (12% of DDDs), drugs administered in hospitals (3% of DDDs) | Nationwide            | Sex, age, date of prescription, date of dispensing, type of dispensing (e.g. multi-dose), total dose, prescribed daily dose (free text), number of DDDs dispensed, ATC code, generic name, costs, characteristics of prescribers | Yes                                                                                          |
| Swedish Register of Education[28]       |                                      | 1985 (annual updates from 2000), earlier versions have been produced in the 1930 and 1970 census, | Population aged 16-74 years old registered as resident in Sweden at 1 January each year. From 2007, information for the group 75+ is also collected                                      | Nationwide            | Highest educational attainment                                                                                                                                                                                                   | Yes                                                                                          |

*eTable 2. Classification of causes of death into illness trajectories*

| Trajectory                                                                                                    | ICD-10 codes                                                                                                                                                    |
|---------------------------------------------------------------------------------------------------------------|-----------------------------------------------------------------------------------------------------------------------------------------------------------------|
| <b>1 – Cancer, leading to a short decline with evident terminal phase</b>                                     |                                                                                                                                                                 |
| Neoplasm                                                                                                      | C00-C26, C30-C34, C37-C41, C43-C58, C60-C85, C88, C90-C97, D00-D09, D32, D33, D37-D48                                                                           |
| <b>2 - Organ failure leading to long-term limitations with intermittent acute episodes</b>                    |                                                                                                                                                                 |
| Diabetes                                                                                                      | E10-E14, G590, G632, H360, M142, N083                                                                                                                           |
| Other endocrinal diseases                                                                                     | E70-E72, E75-E77, E84-E85                                                                                                                                       |
| Certain infectious and parasitic diseases                                                                     | A520-A523, A527, A810, A812, B15-B19, B20-B24                                                                                                                   |
| Diseases of the blood                                                                                         | D60, D61, D69, D70, D752, D758, D86                                                                                                                             |
| Diseases of the cardiovascular system (incl. cerebrovascular diseases)                                        | I231-I233, I238, I25, I50, I60-I64, I67, I688, I69, G46, I65, I66, I680-I682, I27, I42, I43, I51, I520, I70, I73, I74, I792, I970, I971, I978, I980, I981, I988 |
| Diseases of the respiratory system (incl. abnormalities of breathing)                                         | J40-J44, J47, J60-J62, J66, J701, J80, J841, J951-J953, J96, J980-J984, R060, R062-R065, R068                                                                   |
| Diseases of the digestive system (incl. liver diseases)                                                       | K70-K77, K44, K50, K51, K55, K56, K85, K86, K871, K90                                                                                                           |
| Diseases of the skin                                                                                          | L305, L40-L42, L44, L93, L945                                                                                                                                   |
| Diseases of the musculoskeletal system                                                                        | M360, M361, M05, M06, M13, M15, M21, M30-M35, M40-M43, M45-M51, M53, M54, M638, M80, M81, M820, M821, M843, M844, M86-M88, M907, M961                           |
| Diseases of the genitourinary system (incl. renal failure)                                                    | N02-N05, N11, N12, N136, N160, N18, N19, N25, N312, N318, N319, N82                                                                                             |
| Other (incl. congenital conditions)                                                                           | Q01-Q06, Q078, Q079, Q20-Q28, Q31, Q33, Q40-Q45, Q60-Q68, Q714, Q75-Q79, Q850, Q86-87, Q89-Q93, Q95-Q97, Q99                                                    |
| <b>3 – Prolonged dwindling, characterized by a progressive loss of both physical and cognitive capacities</b> |                                                                                                                                                                 |
| Alzheimer's disease                                                                                           | G30-G32                                                                                                                                                         |
| Mental and behavioural disorders                                                                              | F00, F01, F02, F03, F05, F06, R54                                                                                                                               |
| Parkinson's disease                                                                                           | G20-G23                                                                                                                                                         |
| Multiple sclerosis                                                                                            | G35-G37                                                                                                                                                         |
| Other diseases of the nervous system                                                                          | G10, G12, G70-G73, G03-G05, G07, G478, G518, G551, G608, G80-G83, G90-G99                                                                                       |
| <b>4 - Sudden death</b>                                                                                       |                                                                                                                                                                 |
| None of the three trajectories above                                                                          |                                                                                                                                                                 |

Abbreviations: ICD-10, International Classification of Diseases 10th revision



*eTable 3. Details of diagnosis codes and drugs used to detect chronic conditions*

| Chronic disease                                              | ICD-10 Codes                                                                                                                                                         | ATC Codes                                       |
|--------------------------------------------------------------|----------------------------------------------------------------------------------------------------------------------------------------------------------------------|-------------------------------------------------|
| Source(s) of data:                                           | National cause of death register (all contributing causes of death)<br>National patient register (all inpatient and specialized outpatient diagnoses)                | Swedish Prescribed Drugs Register               |
| 1. Allergy                                                   | J30.1-J30.4; J45.0; K52.2; L20; L23; L50.0; Z51.6                                                                                                                    |                                                 |
| 2. Anaemia                                                   | D50-D53; D55-D59 (excl. D56.3; D59.0; D59.2; D59.3; D59.6); D60-D64 (excl. D60.1; D61.1; D61.2; D62; D64.2)                                                          | B03A, B03XA                                     |
| 3. Asthma                                                    | J45                                                                                                                                                                  | R03DC; R03BC                                    |
| 4. Atrial fibrillation                                       | I48                                                                                                                                                                  |                                                 |
| 5. Autoimmune diseases                                       | I73.1; L10 (excl. L10.5); L12; L40; L41; L93-L95; M30-M36 (excl. M32.0; M34.2; M35.7-M35.9; M36.0; M36.1; M36.2; M36.3)                                              | D05                                             |
| 6. Blindness, visual loss                                    | H54 (excl. H54.3); Z44.2; Z97.0                                                                                                                                      |                                                 |
| 7. Blood and blood forming organ diseases                    | D66-D69 (excl. D68.3; D68.4; D69.5); D71; D72.0; D73.0-D73.2; D74 (excl. D74.8); D75.0; D76.1; D76.3; D77; D80 (excl. D80.7); D81-D84; D86; D89 (excl. D89.1; D89.3) |                                                 |
| 8. Bradycardias and conduction diseases                      | I44.1-I44.3; I45.3; I45.5; Z95.0                                                                                                                                     |                                                 |
| 9. Cardiac valve diseases                                    | I05-I08; I09.1; I09.8; I34-I38; I39.0-I39.4; Q22; Q23; Z95.2-Z95.4                                                                                                   |                                                 |
| 10. Cataract and other lens diseases                         | H25-H28; Q12; Z96.1                                                                                                                                                  |                                                 |
| 11. Cerebrovascular disease                                  | G45; G46; I60-I64; I67; I69                                                                                                                                          |                                                 |
| 12. Chromosomal abnormalities                                | Q90-Q99                                                                                                                                                              |                                                 |
| 13. Chronic infectious diseases                              | A15-A19; A30; A31; A50-A53 (excl. A51); A65-A67; A69.2; A81; B20-B24; B38.1; B39.1; B40.1; B57.2-B57.5; B65; B92; B94; J65; M86.3-M86.6                              | J04A, excl. J04AB01, J04AB02, J04AB03 and J04AC |
| 14. Chronic kidney disease                                   | I12.0; I13.0-I13.9; N01, N02, N04, N05; N07; N08; N11; N18.3-N18.9; Q60; Q61.1-Q61.9; Z90.5; Z94.0                                                                   |                                                 |
| 15. Chronic liver disease                                    | B18; K70 (excl. K70.0; K70.1); K71.3-K71.5; K71.7; K72.1; K73; K74; K75.3-K75.8; K76.1; K76.6; K76.7; K77.8; Q44.6; Z94.4                                            |                                                 |
| 16. Chronic pancreas, biliary tract and gallbladder diseases | K80.0; K80.1; K80.2; K80.8; K81.1; K86 (excl. K86.2; K86.3; K86.9); Q44.0-Q44.5; Q45.0                                                                               | A09AA02                                         |
| 17. Chronic ulcer of the skin                                | I83.0; I83.2; L89; L97; L98.4                                                                                                                                        |                                                 |

| Chronic disease                                      | ICD-10 Codes                                                                                                                                                                   | ATC Codes                         |
|------------------------------------------------------|--------------------------------------------------------------------------------------------------------------------------------------------------------------------------------|-----------------------------------|
| Source(s) of data:                                   | National cause of death register (all contributing causes of death)<br>National patient register (all inpatient and specialized outpatient diagnoses)                          | Swedish Prescribed Drugs Register |
| 18. Colitis and related diseases                     | K52.0; K52.8; K55.1; K55.2; K57.2-K57.5; K57.8; K57.9; K58; K59.0; K59.2; K62 (excl. K62.0; K62.1; K62.5; K62.6); K63.4; K64 (excl. K64.5);                                    |                                   |
| 19. COPD, emphysema, chronic bronchitis              | J41-J44; J47                                                                                                                                                                   | R03BB                             |
| 20. Deafness, hearing loss                           | H80; H90; H91.1; H91.3; H91.9; Q16; Z45.3; Z46.1; Z96.2; Z97.4                                                                                                                 |                                   |
| 21. Dementia                                         | F00-F03; F05.1; G30; G31                                                                                                                                                       | N06DA, N06DX01                    |
| 22. Depression and mood diseases                     | F30-F34; F38; F39; F41.2                                                                                                                                                       |                                   |
| 23. Diabetes                                         | E10; E11; E13; E14; E89.1                                                                                                                                                      | A10                               |
| 24. Dorsopathies                                     | M40-M43; M47-M53; Q67.5; Q76.4; Q76.1;                                                                                                                                         |                                   |
| 25. Dyslipidemia                                     | E78                                                                                                                                                                            |                                   |
| 26. Ear, nose, throat diseases                       | H60.4; H66.1-H66.3; H70.1; H71; H73.1; H74.1; H81.0; H83.1; H83.2; H95; J30.0; J31-J33; J34.1-J34.3; J35; J37; J38.0; J38.6; K05.1; K05.3; K07; K11.0; K11.7; Q30-Q32; Q35-Q38 |                                   |
| 27. Epilepsy                                         | G40 (excl. G40.5)                                                                                                                                                              |                                   |
| 28. Esophagus, stomach and duodenum diseases         | I85; I86.4; I98.2; I98.3; K21; K22.0; K22.2; K22.4; K22.5; K22.7; K23.0; K23.1; K25.4-K25.7; K26.4-K26.7; K27.4-K27.7; K28.4-K28.7; K29.3-K29.9; K31.1-K31.5; Q39; Q40; Z90.3  | A02BX                             |
| 29. Glaucoma                                         | H40.1-H40.9                                                                                                                                                                    | S01ED                             |
| 30. Heart failure                                    | I11.0; I13.0; I13.2; I27; I28.0; I42; I43; I50; I51.5; I51.7; I52.8; Z94.1; Z94.3                                                                                              |                                   |
| 31. Hematological neoplasms                          | C81-C96                                                                                                                                                                        |                                   |
| 32. Hypertension                                     | I10-I15                                                                                                                                                                        |                                   |
| 33. Inflammatory arthropathies                       | M02.3; M05-M14; M45; M46.0; M46.1; M46.8; M46.9                                                                                                                                | M01CB                             |
| 34. Inflammatory bowel disease                       | K50; K51                                                                                                                                                                       | A07E                              |
| 35. Ischemic heart disease                           | I20-I22; I24; I25; Z95.1; Z95.5                                                                                                                                                | C01DA, C01EB18                    |
| 36. Migraine and facial pain syndromes               | G43; G44.0-G44.3; G44.8; G50                                                                                                                                                   | N02C                              |
| 37. Multiple sclerosis                               | G35                                                                                                                                                                            |                                   |
| 38. Neurotic, stress-related and somatoform diseases | F40-F48 (excl. F43.0; F43.2)                                                                                                                                                   |                                   |
| 39. Obesity                                          | E66                                                                                                                                                                            |                                   |

| Chronic disease                                          | ICD-10 Codes                                                                                                                                                                                                                                                                                                                                               | ATC Codes                         |
|----------------------------------------------------------|------------------------------------------------------------------------------------------------------------------------------------------------------------------------------------------------------------------------------------------------------------------------------------------------------------------------------------------------------------|-----------------------------------|
| Source(s) of data:                                       | National cause of death register (all contributing causes of death)<br>National patient register (all inpatient and specialized outpatient diagnoses)                                                                                                                                                                                                      | Swedish Prescribed Drugs Register |
| 40. Osteoarthritis and other degenerative joint diseases | M15-M19; M36.2; M36.3                                                                                                                                                                                                                                                                                                                                      |                                   |
| 41. Osteoporosis                                         | M80-M82                                                                                                                                                                                                                                                                                                                                                    | M05BA; M05BB; M05BX03; M05BX53    |
| 42. Other cardiovascular diseases                        | I09 (excl. I09.1; I09.8); I28.1; I31.0; I31.1; I45.6; I49.5; I49.8; I70-I72 (excl. I70.2); I79.0; I79.1; I95.0; I95.1; I95.8; Q20; Q21; Q24-Q28; Z95.8; Z95.9                                                                                                                                                                                              |                                   |
| 43. Other digestive diseases                             | K66.0; K90.0-K90.2; K91.1; K93; Q41-Q43; R15; Z90.4; Z98.0                                                                                                                                                                                                                                                                                                 |                                   |
| 44. Other eye diseases                                   | H02.2-H02.5; H04 (excl. H04.3); H05 (excl. H05.0); H10.4; H17; H18.4-H18.9; H19.3; H19.8; H20.1; H21; H31.0-H31.2; H31.8; H31.9; H33; H35.2-H35.5; H35.7-H35.9; H36; H47-H49 (excl. H47.0; H47.1; H48.1); H51; Q10-Q15 (excl. Q12); Z94.7                                                                                                                  |                                   |
| 45. Other genitourinary diseases                         | B90.1; N20.0; N20.2; N20.9; N21.0; N21.8; N21.9; N22; N30.1-N30.4; N31; N32.0; N32.3; N32.8; N32.9; N33; N35; N39.3; N39.4; N48.0; N48.4; N48.9; N70.1; N71.1; N73.1; N73.4; N73.6; N76.1; N76.3; N81; N88; N89.5; N90.5; N95.2; Q54; Q62.0-Q62.4; Q62.7; Q62.8; Q63.8; Q63.9; Q64.0; Q64.1; Q64.3-Q64.9; Z90.6; Z90.7; Z96.0                              |                                   |
| 46. Other metabolic diseases                             | E20-E31 (excl. E23.1; E24.2; E24.4; E27.3; E30); E34 (excl. E34.3; E34.4); E35 (excl. E35.0); E40-E46 (excl. E44.1); E64; E70-E72; E74-E77; E79 (excl. E79.0); E80 (excl. E80.4); E83-E89 (excl. E86; E87; E88.3; E89.0; E89.1); K90.3; K90.4; K90.8; K90.9; K91.2; M83; M88; N25                                                                          |                                   |
| 47. Other musculoskeletal and joint diseases             | B90.2; M21.2-M21.9; M22-M24; M25.2; M25.3; M35.7; M61; M65.2-M65.4; M70.0; M72.0; M72.2; M72.4; M75.0; M75.1; M75.3; M75.4; M79.7; M84.1; M89; M91; M93; M94; M96; M99; S38.2; S48; S58; S68; S78; S88; S98; T05; T09.6; T11.6; T13.6; T14.7; T90-T98; Q65; Q66; Q68; Q71-Q74; Q77; Q78; Q79.6; Q79.8; Q87; Z44.0; Z44.1; Z89.1-Z89.9; Z94.6; Z96.6; Z97.1 |                                   |
| 48. Other neurological diseases                          | B90.0; D48.2; G04.1; G09-G14 (excl. G13.0; G13.1); G24-G26 (excl. G25.1; G25.4; G25.6); G32; G37; G51-G53 (excl. G51.0); G70; G71; G72.3-72.9; G73 (excl. G73.2-G73.4); G80-G83 (excl. G83.8); G90; G91; G93.8; G93.9; G95; G99; M47.1; Q00-Q07; Q76.0                                                                                                     |                                   |

| Chronic disease                               | ICD-10 Codes                                                                                                                                                                                                                                                                    | ATC Codes                         |
|-----------------------------------------------|---------------------------------------------------------------------------------------------------------------------------------------------------------------------------------------------------------------------------------------------------------------------------------|-----------------------------------|
| Source(s) of data:                            | National cause of death register (all contributing causes of death)<br>National patient register (all inpatient and specialized outpatient diagnoses)                                                                                                                           | Swedish Prescribed Drugs Register |
| 49. Other psychiatric and behavioral diseases | F04; F06; F07; F09; F10.2; F10.6; F10.7; F11.2; F11.6; F11.7; F12.2; F12.6; F12.7; F13.2; F13.6; F13.7; F14.2; F14.6; F14.7; F15.2; F15.6; F15.7; F16.2; F16.6; F16.7; F17.2; F17.6; F17.7; F18.2; F18.6; F18.7; F19.2; F19.6; F19.7; F50; F52; F60-F63; F68; F70-F89; F95; F99 | N07BB                             |
| 50. Other respiratory diseases                | B90.9; E66.2; J60-J67; J68.4; J70.1; J70.3; J70.4; J84; J92; J94.1; J95.3; J95.5; J96.1; J98 (excl. J98.1); Q33; Q34; Z90.2; Z94.2; Z94.3; Z96.3                                                                                                                                |                                   |
| 51. Other skin diseases                       | L13; L28; L30.1; L43 (excl. L43.2); L50.8; L58.1; L85; Q80; Q81; Q82.1; Q82.2; Q82.9                                                                                                                                                                                            |                                   |
| 52. Parkinson and parkinsonism                | G20-G23 (excl. G21.0)                                                                                                                                                                                                                                                           | N04BA; N04BX                      |
| 53. Peripheral neuropathy                     | B91; G54-G60; G62.8; G62.9; G63 (excl. G63.1); M47.2; M53.1; M54.1                                                                                                                                                                                                              |                                   |
| 54. Peripheral vascular disease               | I70.2; I73 (excl. I73.1; I73.8); I79.2; I79.8                                                                                                                                                                                                                                   | B01AC23                           |
| 55. Prostate diseases                         | N40; N41.1; N41.8                                                                                                                                                                                                                                                               | G04C (excl. G04CB)                |
| 56. Schizophrenia and delusional diseases     | F20; F22; F24; F25; F28                                                                                                                                                                                                                                                         |                                   |
| 57. Sleep disorders                           | G47; F51.0-F51.3                                                                                                                                                                                                                                                                |                                   |
| 58. Solid neoplasms                           | All C (excl. C81-C96); D00-D09; D32.0; D32.1; D32.9; D33.0-D33.4; Q85                                                                                                                                                                                                           |                                   |
| 59. Thyroid disease                           | E00-E03 (excl. E03.5); E05; E06.2; E06.3; E06.5; E07; E35.0; E89.0                                                                                                                                                                                                              | H03AA; H03B                       |
| 60. Venous and lymphatic diseases             | I78.0; I83; I87; I89; I97.2; Q82.0                                                                                                                                                                                                                                              |                                   |

Abbreviations: ICD-10: International Classification of Diseases, 10th revision; ATC: Anatomical Therapeutic Chemical classification system

**Table 4. Diagnosis codes and weights used to calculate the Hospital Frailty Risk score**[27]

| Conditions                                                                                          | ICD10-codes | Weight |
|-----------------------------------------------------------------------------------------------------|-------------|--------|
| Dementia in Alzheimer's disease                                                                     | F00         | 7.1    |
| Hemiplegia                                                                                          | G81         | 4.4    |
| Alzheimer's disease                                                                                 | G30         | 4      |
| Sequelae of cerebrovascular disease (secondary codes)                                               | I69         | 3.7    |
| Other symptoms and signs involving the nervous and musculoskeletal systems (R29·6 Tendency to fall) | R29         | 3.6    |
| Other disorders of urinary system (includes urinary tract infection and urinary incontinence)       | N39         | 3.2    |
| Delirium, not induced by alcohol and other psychoactive substances                                  | F05         | 3.2    |
| Unspecified fall                                                                                    | W19         | 3.2    |
| Superficial injury of head                                                                          | S00         | 3.2    |
| Unspecified haematuria                                                                              | R31         | 3      |
| Other bacterial agents as the cause of diseases classified to other chapters (secondary code)       | B96         | 2.9    |
| Other symptoms and signs involving cognitive functions and awareness                                | R41         | 2.7    |
| Abnormalities of gait and mobility                                                                  | R26         | 2.6    |
| Other cerebrovascular diseases                                                                      | I67         | 2.6    |
| Convulsions, not elsewhere classified                                                               | R56         | 2.6    |
| Somnolence, stupor and coma                                                                         | R40         | 2.5    |
| Complications of genitourinary prosthetic devices, implants and grafts                              | T83         | 2.4    |
| Intracranial injury                                                                                 | S06         | 2.4    |
| Fracture of shoulder and upper arm                                                                  | S42         | 2.3    |
| Other disorders of fluid, electrolyte and acid-base balance                                         | E87         | 2.3    |
| Other joint disorders, not elsewhere classified                                                     | M25         | 2.3    |
| Volume depletion                                                                                    | E86         | 2.3    |
| Senility                                                                                            | R54         | 2.2    |
| Care involving use of rehabilitation procedures                                                     | Z50         | 2.1    |
| Unspecified dementia                                                                                | F03         | 2.1    |
| Other fall on same level                                                                            | W18         | 2.1    |
| Problems related to medical facilities and other health care                                        | Z75         | 2      |
| Vascular dementia                                                                                   | F01         | 2      |
| Superficial injury of lower leg                                                                     | S80         | 2      |
| Cellulitis                                                                                          | L03         | 2      |
| Blindness and low vision                                                                            | H54         | 1.9    |
| Deficiency of other B group vitamins                                                                | E53         | 1.9    |
| Problems related to social environment                                                              | Z60         | 1.8    |
| Parkinson's disease                                                                                 | G20         | 1.8    |
| Syncope and collapse                                                                                | R55         | 1.8    |
| Fracture of rib(s), sternum and thoracic spine                                                      | S22         | 1.8    |
| Other functional intestinal disorders                                                               | K59         | 1.8    |
| Acute renal failure                                                                                 | N17         | 1.8    |
| Decubitus ulcer                                                                                     | L89         | 1.7    |
| Carrier of infectious disease                                                                       | Z22         | 1.7    |
| Streptococcus and staphylococcus as the cause of diseases classified to other chapters              | B95         | 1.7    |
| Ulcer of lower limb, not elsewhere classified                                                       | L97         | 1.6    |

|                                                                         |     |     |
|-------------------------------------------------------------------------|-----|-----|
| Other symptoms and signs involving general sensations and perceptions   | R44 | 1.6 |
| Duodenal ulcer                                                          | K26 | 1.6 |
| Hypotension                                                             | I95 | 1.6 |
| Unspecified renal failure                                               | N19 | 1.6 |
| Other septicaemia                                                       | A41 | 1.6 |
| Personal history of other diseases and conditions                       | Z87 | 1.5 |
| Respiratory failure, not elsewhere classified                           | J96 | 1.5 |
| Exposure to unspecified factor                                          | X59 | 1.5 |
| Other arthrosis                                                         | M19 | 1.5 |
| Epilepsy                                                                | G40 | 1.5 |
| Osteoporosis without pathological fracture                              | M81 | 1.4 |
| Fracture of femur                                                       | S72 | 1.4 |
| Fracture of lumbar spine and pelvis                                     | S32 | 1.4 |
| Other disorders of pancreatic internal secretion                        | E16 | 1.4 |
| Abnormal results of function studies                                    | R94 | 1.4 |
| Chronic renal failure                                                   | N18 | 1.4 |
| Retention of urine                                                      | R33 | 1.3 |
| Unknown and unspecified causes of morbidity                             | R69 | 1.3 |
| Other disorders of kidney and ureter, not elsewhere classified          | N28 | 1.3 |
| Unspecified urinary incontinence                                        | R32 | 1.2 |
| Other degenerative diseases of nervous system, not elsewhere classified | G31 | 1.2 |
| Nosocomial condition                                                    | Y95 | 1.2 |
| Other and unspecified injuries of head                                  | S09 | 1.2 |
| Symptoms and signs involving emotional state                            | R45 | 1.2 |
| Transient cerebral ischaemic attacks and related syndromes              | G45 | 1.2 |
| Problems related to care-provider dependency                            | Z74 | 1.1 |
| Other soft tissue disorders, not elsewhere classified                   | M79 | 1.1 |
| Fall involving bed                                                      | W06 | 1.1 |
| Open wound of head                                                      | S01 | 1.1 |
| Other bacterial intestinal infections                                   | A04 | 1.1 |
| Diarrhoea and gastroenteritis of presumed infectious origin             | A09 | 1.1 |
| Pneumonia, organism unspecified                                         | J18 | 1.1 |
| Pneumonitis due to solids and liquids                                   | J69 | 1   |
| Speech disturbances, not elsewhere classified                           | R47 | 1   |
| Vitamin D deficiency                                                    | E55 | 1   |
| Artificial opening status                                               | Z93 | 1   |
| Gangrene, not elsewhere classified                                      | R02 | 1   |
| Symptoms and signs concerning food and fluid intake                     | R63 | 0.9 |
| Other hearing loss                                                      | H91 | 0.9 |
| Fall on and from stairs and steps                                       | W10 | 0.9 |
| Fall on same level from slipping, tripping and stumbling                | W01 | 0.9 |
| Thyrotoxicosis [hyperthyroidism]                                        | E05 | 0.9 |
| Scoliosis                                                               | M41 | 0.9 |
| Dysphagia                                                               | R13 | 0.8 |
| Dependence on enabling machines and devices                             | Z99 | 0.8 |
| Agent resistant to penicillin and related antibiotics                   | U80 | 0.8 |
| Osteoporosis with pathological fracture                                 | M80 | 0.8 |
| Other diseases of digestive system                                      | K92 | 0.8 |
| Cerebral Infarction                                                     | I63 | 0.8 |
| Calculus of kidney and ureter                                           | N20 | 0.7 |
| Mental and behavioural disorders due to use of alcohol                  | F10 | 0.7 |
| Other medical procedures as the cause of abnormal reaction              | Y84 | 0.7 |

|                                                            |     |     |
|------------------------------------------------------------|-----|-----|
| Abnormalities of heart beat                                | R00 | 0.7 |
| Unspecified acute lower respiratory infection              | J22 | 0.7 |
| Problems related to life-management difficulty             | Z73 | 0.6 |
| Other abnormal findings of blood chemistry                 | R79 | 0.6 |
| Personal history of risk-factors, not elsewhere classified | Z91 | 0.5 |
| Open wound of forearm                                      | S51 | 0.5 |
| Depressive episode                                         | F32 | 0.5 |
| Spinal stenosis (secondary code only)                      | M48 | 0.5 |
| Disorders of mineral metabolism                            | E83 | 0.4 |
| Polyarthrosis                                              | M15 | 0.4 |
| Other anaemias                                             | D64 | 0.4 |
| Other local infections of skin and subcutaneous tissue     | L08 | 0.4 |
| Nausea and vomiting                                        | R11 | 0.3 |
| Other noninfective gastroenteritis and colitis             | K52 | 0.3 |
| Fever of unknown origin                                    | R50 | 0.1 |

Abbreviations: ICD-10: International Classification of Diseases, 10th revision;

*eTable 5. Categorization of levels of education*

| Category            | ISCED 97                                  | No. decedents |
|---------------------|-------------------------------------------|---------------|
| Primary education   | Primary level of education (1)            | 34 983        |
|                     | Unspecified                               | 30            |
| Secondary education | Lower secondary education (2A)            | 5 194         |
|                     | Upper secondary education ≤2 years (3C)   | 18 935        |
|                     | Upper secondary education 3 years (3A)    | 6 413         |
|                     | Post-secondary non tertiary education (4) | 803           |
|                     | Unspecified                               | 98            |
| Tertiary education  | Post-secondary education <3 years (5B)    | 3 498         |
|                     | Post-secondary education ≥3 years (5A)    | 5 335         |
|                     | Post-graduate education (6)               | 384           |
|                     | Unspecified                               | 32            |
| Missing             |                                           | 1 610         |

Abbreviations: ISCED 97: International Standard Classification of Education 1997



**eTable 6. Details of diagnosis codes used to identify potentially unexpected causes of death in older adults**

| ICD Chapter                                                                             | Multiple cause of death                                                                                                             | Inpatient and specialized care admissions                                                              |
|-----------------------------------------------------------------------------------------|-------------------------------------------------------------------------------------------------------------------------------------|--------------------------------------------------------------------------------------------------------|
| <i>Source(s) of data:</i>                                                               | <i>National cause of death register (underlying and contributing causes of death)</i>                                               | <i>National patient register (all inpatient and specialized outpatient care diagnoses<sup>a</sup>)</i> |
| Certain infectious and parasitic diseases                                               | A00; A01; A02; A03; A04; A05; A06; A07; A08; A09; A39; A40; A41; A499; A80; A81; A87; B371; B375; B377; B440; B441; B448; B449; B99 |                                                                                                        |
| Diseases of the blood and blood-forming organs                                          | D611; D619; D649                                                                                                                    |                                                                                                        |
| Endocrine, nutritional and metabolic diseases                                           | E86                                                                                                                                 |                                                                                                        |
| Diseases of the nervous system                                                          | G000; G001; G002; G003; G009; G039; G040; G048; G049; G060; G062; G931; G936                                                        |                                                                                                        |
| Ischaemic heart diseases and pulmonary heart diseases                                   | I21; I23; I25; I249; I249; I255; I26; I28                                                                                           | No history of ischemic heart disease (I20-I25) or pulmonary embolism (I26)                             |
| Other forms of heart disease                                                            | I30; I33; I40; I461; I469                                                                                                           |                                                                                                        |
| Cerebrovascular diseases                                                                | I60; I61; I62; I63; I64; I65; I66; I67                                                                                              | No history of cerebrovascular disease (I60-I69)                                                        |
| Diseases of arteries, arterioles and capillaries                                        | I71; I72; I74; I97                                                                                                                  |                                                                                                        |
| Diseases of the respiratory system                                                      | J069; J09; J10; J11; J12; J13; J14; J15; J18; J22; J690; J81; J851; J852; J93; J958; J960                                           |                                                                                                        |
| Diseases of the digestive system                                                        | K250; K251; K252; K253; K254; K255; K256; K257; K259; K260; K261; K263; K264; K265; K266; K269; K550; K65; K720; K810; K859         |                                                                                                        |
| Diseases of the musculoskeletal system and connective tissue                            | M726                                                                                                                                |                                                                                                        |
| Diseases of the genitourinary system                                                    | N00; N04; N10; N17; N390; N990; N998                                                                                                | No history of diabetes (E10-14) or renal failure (N18-19)                                              |
| Symptoms, signs and abnormal clinical and laboratory findings, not elsewhere classified | R02; R572; R570; R571                                                                                                               |                                                                                                        |
| Injury, poisoning and certain other consequences of external causes                     | S065; S066; S068; S069; S071; S10-99; T00-T99                                                                                       |                                                                                                        |
| External causes of morbidity and mortality                                              | V00-V99; X60-79; X80-84                                                                                                             |                                                                                                        |

Abbreviations: ICD-10: International Classification of Diseases, 10th revision;

*a*: Diagnoses codes were captured in the National Patient Register during the period ranging from 5 year before death until death.

*eTable 7. RECORD Checklist*

| Item No                  |    | Recommendation                                                                                                                                                                                                                     | Section                                                                                                   |
|--------------------------|----|------------------------------------------------------------------------------------------------------------------------------------------------------------------------------------------------------------------------------------|-----------------------------------------------------------------------------------------------------------|
| Title and abstract       | 1  | (1)The type of data used should be specified in the title or abstract. When possible, the name of the databases used should be included.                                                                                           | Abstract                                                                                                  |
|                          |    | (2) If applicable, the geographic region and timeframe within which the study took place should be reported in the title or abstract.                                                                                              | Abstract                                                                                                  |
|                          |    | (3) If linkage between databases was conducted for the study, this should be clearly stated in the title or abstract.                                                                                                              | Abstract                                                                                                  |
| Introduction             |    |                                                                                                                                                                                                                                    |                                                                                                           |
| Background/rationale     | 2  | Explain the scientific background and rationale for the investigation being reported                                                                                                                                               | Introduction                                                                                              |
| Objectives               | 3  | State specific objectives, including any prespecified hypotheses                                                                                                                                                                   | Introduction - last paragraph                                                                             |
| Methods                  |    |                                                                                                                                                                                                                                    |                                                                                                           |
| Study design             | 4  | Present key elements of study design early in the paper                                                                                                                                                                            | Methods – Study design and population section, Supplementary eFigure 1                                    |
| Setting                  | 5  | Describe the setting, locations, and relevant dates, including periods of recruitment, exposure, follow-up, and data collection                                                                                                    | Methods – Study design and population section                                                             |
| Participants             | 6  | (1) The methods of study population selection (such as codes or algorithms used to identify subjects) should be listed in detail. If this is not possible, an explanation should be provided.                                      | Methods – Study design and population section                                                             |
|                          |    | (2) Any validation studies of the codes or algorithms used to select the population should be referenced. If validation was conducted for this study and not published elsewhere, detailed methods and results should be provided. | NA                                                                                                        |
|                          |    | (3) If the study involved linkage of databases, consider use of a flow diagram or other graphical display to demonstrate the data linkage process, including the number of individuals with linked data at each stage.             | Supplementary eFigure 4                                                                                   |
| Variables                | 7  | A complete list of codes and algorithms used to classify exposures, outcomes, confounders, and effect modifiers should be provided. If these cannot be reported, an explanation should be provided.                                | Methods – Outcome/Illness trajectories and individual characteristics/Covariates Supplementary eTable 2-6 |
| Data sources/measurement | 8* | For each variable of interest, give sources of data and details of methods of assessment (measurement). Describe comparability of assessment methods if there is more than one group                                               | Methods – Outcome/Illness trajectories and individual characteristics/Covariates Supplementary eTable 2-6 |
| Bias                     | 9  | Describe any efforts to address potential sources of bias                                                                                                                                                                          | Methods - Outcome                                                                                         |
| Study size               | 10 | Explain how the study size was arrived at                                                                                                                                                                                          | Supplementary eFigure 4                                                                                   |

|                                  |     |                                                                                                                                                                                                                                                                                                  |                                                                                  |
|----------------------------------|-----|--------------------------------------------------------------------------------------------------------------------------------------------------------------------------------------------------------------------------------------------------------------------------------------------------|----------------------------------------------------------------------------------|
| Quantitative variables           | 11  | Explain how quantitative variables were handled in the analyses. If applicable, describe which groupings were chosen and why                                                                                                                                                                     | Methods – Outcome/Illness trajectories and individual characteristics/Covariates |
| Statistical methods              | 12  | (a) Describe all statistical methods, including those used to control for confounding                                                                                                                                                                                                            | Methods – Statistical analysis                                                   |
|                                  |     | (b) Describe any methods used to examine subgroups and interactions                                                                                                                                                                                                                              | NA                                                                               |
|                                  |     | (c) Explain how missing data were addressed                                                                                                                                                                                                                                                      | Table 2, Figure 2                                                                |
|                                  |     | (d) If applicable, explain how loss to follow-up was addressed                                                                                                                                                                                                                                   | NA                                                                               |
|                                  |     | (e) Describe any sensitivity analyses                                                                                                                                                                                                                                                            | Methods – Statistical analysis                                                   |
| Data access and cleaning methods |     | Authors should describe the extent to which the investigators had access to the database population used to create the study population.                                                                                                                                                         | Methods – Study design and population                                            |
|                                  |     | Authors should provide information on the data cleaning methods used in the study.                                                                                                                                                                                                               | NA                                                                               |
|                                  |     | State whether the study included person-level, institutional-level, or other data linkage across two or more databases. The methods of linkage and methods of linkage quality evaluation should be provided.                                                                                     | Methods – Data sources                                                           |
| Results                          |     |                                                                                                                                                                                                                                                                                                  |                                                                                  |
| Participants                     | 13* | (a) Describe in detail the selection of the persons included in the study (i.e., study population selection) including filtering based on data quality, data availability and linkage. The selection of included persons can be described in the text and/or by means of the study flow diagram. | Supplementary eFigure 4                                                          |
|                                  |     | (b) Give reasons for non-participation at each stage                                                                                                                                                                                                                                             | Supplementary eFigure 4                                                          |
|                                  |     | (c) Consider use of a flow diagram                                                                                                                                                                                                                                                               | Supplementary eFigure 4                                                          |
| Descriptive data                 | 14* | (a) Give characteristics of study participants (eg demographic, clinical, social) and information on exposures and potential confounders                                                                                                                                                         | Table 1                                                                          |
|                                  |     | (b) Indicate number of participants with missing data for each variable of interest                                                                                                                                                                                                              | Table 1                                                                          |
|                                  |     | (c) Summarise follow-up time (eg, average and total amount)                                                                                                                                                                                                                                      | Table 2                                                                          |
| Outcome data                     | 15* | Report numbers of outcome events or summary measures over time                                                                                                                                                                                                                                   |                                                                                  |
| Main results                     | 16  | (a) Give unadjusted estimates and, if applicable, confounder-adjusted estimates and their precision (eg, 95% confidence interval). Make clear which confounders were adjusted for and why they were included                                                                                     | Table 2, Methods – Statistical analysis                                          |
|                                  |     | (b) Report category boundaries when continuous variables were categorized                                                                                                                                                                                                                        | NA                                                                               |
|                                  |     | (c) If relevant, consider translating estimates of relative risk into absolute risk for a meaningful time period                                                                                                                                                                                 | NA                                                                               |

|                                                           |    |                                                                                                                                                                                                                                                                                             |                                                      |
|-----------------------------------------------------------|----|---------------------------------------------------------------------------------------------------------------------------------------------------------------------------------------------------------------------------------------------------------------------------------------------|------------------------------------------------------|
| Other analyses                                            | 17 | Report other analyses done—eg analyses of subgroups and interactions, and sensitivity analyses                                                                                                                                                                                              | Results – Sensitivity analysis                       |
| <b>Discussion</b>                                         |    |                                                                                                                                                                                                                                                                                             |                                                      |
| Key results                                               | 18 | Summarise key results with reference to study objectives                                                                                                                                                                                                                                    | Discussion – first paragraph                         |
| Limitations                                               | 19 | Discuss the implications of using data that were not created or collected to answer the specific research question(s). Include discussion of misclassification bias, unmeasured confounding, missing data, and changing eligibility over time, as they pertain to the study being reported. | Discussion – last paragraph                          |
| Interpretation                                            | 20 | Give a cautious overall interpretation of results considering objectives, limitations, multiplicity of analyses, results from similar studies, and other relevant evidence                                                                                                                  | Discussion first and second paragraphs               |
| Generalisability                                          | 21 | Discuss the generalisability (external validity) of the study results                                                                                                                                                                                                                       | Discussion – last paragraph                          |
| <b>Other information</b>                                  |    |                                                                                                                                                                                                                                                                                             |                                                      |
| Funding                                                   | 22 | Give the source of funding and the role of the funders for the present study and, if applicable, for the original study on which the present article is based                                                                                                                               | Acknowledgements: Funding                            |
| Accessibility of protocol, raw data, and programming code |    | Authors should provide information on how to access any supplemental information such as the study protocol, raw data, or programming code.                                                                                                                                                 | Acknowledgements: Availability of data and materials |

***eTable 8. Fifteen most common main underlying cause of deaths of the decedents of sudden death illness trajectory (N=5700)***

| Main underlying cause of death (ICD-10) | ICD-10 Description                                              | Frequency (N) | Share (%) of total |
|-----------------------------------------|-----------------------------------------------------------------|---------------|--------------------|
| I21                                     | Acute myocardial infarction                                     | 862           | 15.12              |
| J18                                     | Pneumonia, unspecified                                          | 719           | 12.61              |
| I71                                     | Aortic aneurysm and dissection                                  | 331           | 5.81               |
| A41                                     | Other sepsis                                                    | 288           | 5.05               |
| X59                                     | Exposure to unspecified factor                                  | 229           | 4.02               |
| W19                                     | Unspecified fall                                                | 221           | 3.88               |
| I46                                     | Cardiac arrest                                                  | 214           | 3.75               |
| I10                                     | Essential (primary) hypertension                                | 144           | 2.53               |
| R68                                     | Other general symptoms and signs                                | 138           | 2.42               |
| I26                                     | Pulmonary embolism                                              | 116           | 2.04               |
| N39                                     | Urinary tract infection, site not specified                     | 111           | 1.95               |
| K92                                     | Other diseases of digestive system                              | 96            | 1.68               |
| R64                                     | Cachexia                                                        | 93            | 1.63               |
| X70                                     | Intentional self-harm by hanging, strangulation and suffocation | 89            | 1.56               |
| I48                                     | Atrial fibrillation and flutter                                 | 82            | 1.44               |

Abbreviations: ICD-10: International Classification of Diseases, 10th revision

***eTable 9. Incidence rate of unplanned hospitalisation by week, stratified by illness trajectory, sex- and age-standardised (direct standardization)***

| Weeks before death | Overall | Cancer | Organ failure | Prolonged dwindling | Sudden death |
|--------------------|---------|--------|---------------|---------------------|--------------|
| 52                 | 1.5     | 1.6    | 1.8           | 1.1                 | 1.0          |
| 51                 | 1.5     | 1.7    | 1.7           | 1.2                 | 0.8          |
| 50                 | 1.6     | 1.8    | 1.8           | 1.1                 | 1.1          |
| 49                 | 1.5     | 1.6    | 1.8           | 1.1                 | 1.3          |
| 48                 | 1.6     | 1.6    | 2.0           | 1.1                 | 0.9          |
| 47                 | 1.5     | 1.7    | 1.8           | 0.9                 | 0.9          |
| 46                 | 1.6     | 1.8    | 1.8           | 1.0                 | 1.3          |
| 45                 | 1.6     | 1.8    | 2.0           | 1.1                 | 1.0          |
| 44                 | 1.6     | 1.9    | 1.9           | 1.1                 | 1.1          |
| 43                 | 1.5     | 1.8    | 1.7           | 1.1                 | 0.9          |
| 42                 | 1.7     | 2.0    | 2.0           | 1.1                 | 0.9          |
| 41                 | 1.7     | 2.0    | 2.0           | 1.2                 | 1.1          |
| 40                 | 1.8     | 2.2    | 1.9           | 1.1                 | 1.5          |
| 39                 | 1.8     | 2.2    | 2.0           | 1.1                 | 1.2          |
| 38                 | 1.7     | 2.1    | 1.8           | 1.2                 | 1.2          |
| 37                 | 1.8     | 2.1    | 2.0           | 1.2                 | 1.3          |
| 36                 | 1.9     | 2.3    | 2.1           | 1.2                 | 1.2          |
| 35                 | 1.8     | 2.2    | 2.1           | 1.1                 | 1.2          |
| 34                 | 1.8     | 2.4    | 2.1           | 1.1                 | 1.0          |
| 33                 | 1.9     | 2.5    | 2.0           | 1.3                 | 1.1          |
| 32                 | 1.9     | 2.3    | 2.3           | 1.3                 | 1.1          |
| 31                 | 1.9     | 2.6    | 1.9           | 1.2                 | 1.1          |
| 30                 | 2.0     | 2.4    | 2.3           | 1.4                 | 1.2          |
| 29                 | 2.0     | 2.6    | 2.1           | 1.2                 | 1.3          |
| 28                 | 2.0     | 2.7    | 2.2           | 1.1                 | 1.2          |
| 27                 | 2.1     | 2.7    | 2.3           | 1.3                 | 1.3          |
| 26                 | 2.1     | 2.8    | 2.3           | 1.2                 | 1.2          |
| 25                 | 2.2     | 2.8    | 2.4           | 1.3                 | 1.2          |
| 24                 | 2.3     | 3.2    | 2.4           | 1.3                 | 1.6          |
| 23                 | 2.3     | 3.2    | 2.6           | 1.3                 | 1.3          |
| 22                 | 2.3     | 3.1    | 2.5           | 1.4                 | 1.7          |
| 21                 | 2.5     | 3.6    | 2.7           | 1.5                 | 1.3          |
| 20                 | 2.5     | 3.4    | 2.8           | 1.4                 | 1.5          |
| 19                 | 2.8     | 3.7    | 3.1           | 1.6                 | 1.7          |
| 18                 | 2.8     | 3.9    | 3.1           | 1.6                 | 1.6          |
| 17                 | 2.9     | 3.9    | 3.2           | 1.6                 | 1.7          |
| 16                 | 3.1     | 4.6    | 3.2           | 1.6                 | 1.7          |
| 15                 | 3.2     | 4.7    | 3.3           | 1.8                 | 1.8          |
| 14                 | 3.4     | 5.2    | 3.6           | 1.7                 | 1.8          |
| 13                 | 3.6     | 5.5    | 3.7           | 1.7                 | 2.2          |
| 12                 | 3.9     | 6.1    | 3.8           | 2.0                 | 2.3          |
| 11                 | 4.1     | 6.5    | 4.1           | 2.1                 | 2.1          |
| 10                 | 4.5     | 7.1    | 4.4           | 2.3                 | 2.4          |
| 9                  | 4.8     | 7.5    | 4.8           | 2.4                 | 2.8          |
| 8                  | 5.2     | 8.2    | 5.2           | 2.7                 | 2.8          |
| 7                  | 5.9     | 9.3    | 6.0           | 3.0                 | 3.1          |

| <b>Weeks before death</b> | <b>Overall</b> | <b>Cancer</b> | <b>Organ failure</b> | <b>Prolonged dwindling</b> | <b>Sudden death</b> |
|---------------------------|----------------|---------------|----------------------|----------------------------|---------------------|
| 6                         | 6.7            | 10.8          | 6.6                  | 3.4                        | 3.3                 |
| 5                         | 7.9            | 12.9          | 7.7                  | 4.2                        | 4.5                 |
| 4                         | 9.2            | 14.4          | 9.2                  | 4.9                        | 5.6                 |
| 3                         | 11.3           | 16.9          | 12.2                 | 5.7                        | 8.4                 |
| 2                         | 15.3           | 20.2          | 18.7                 | 7.6                        | 12.9                |
| 1                         | 26.2           | 24.2          | 38.0                 | 11.0                       | 43.9                |

***eTable 10. Proportion of decedents with  $\geq 1$  unplanned hospitalisation during each of the 52 weeks before death, stratified by illness trajectory***

| Weeks before death | Illness trajectory       |                         |                                |                                      |                              |
|--------------------|--------------------------|-------------------------|--------------------------------|--------------------------------------|------------------------------|
|                    | Overall (%)<br>N= 77 315 | Cancer (%)<br>N= 23 213 | Organ failure (%)<br>N= 28 338 | Prolonged dwindling (%)<br>N= 20 064 | Sudden death (%)<br>N= 5 700 |
| 52                 | 1.47                     | 1.56                    | 1.78                           | 1.08                                 | 0.98                         |
| 51                 | 1.42                     | 1.61                    | 1.58                           | 1.16                                 | 0.82                         |
| 50                 | 1.50                     | 1.71                    | 1.75                           | 1.03                                 | 1.07                         |
| 49                 | 1.46                     | 1.51                    | 1.71                           | 1.10                                 | 1.26                         |
| 48                 | 1.51                     | 1.56                    | 1.88                           | 1.11                                 | 0.91                         |
| 47                 | 1.44                     | 1.68                    | 1.75                           | 0.90                                 | 0.86                         |
| 46                 | 1.51                     | 1.75                    | 1.76                           | 0.93                                 | 1.28                         |
| 45                 | 1.55                     | 1.75                    | 1.90                           | 0.99                                 | 1.00                         |
| 44                 | 1.57                     | 1.84                    | 1.82                           | 1.06                                 | 1.05                         |
| 43                 | 1.48                     | 1.73                    | 1.67                           | 1.08                                 | 0.91                         |
| 42                 | 1.63                     | 1.93                    | 1.93                           | 1.08                                 | 0.86                         |
| 41                 | 1.64                     | 1.95                    | 1.87                           | 1.13                                 | 1.05                         |
| 40                 | 1.69                     | 2.13                    | 1.84                           | 1.04                                 | 1.37                         |
| 39                 | 1.72                     | 2.09                    | 1.98                           | 1.10                                 | 1.16                         |
| 38                 | 1.64                     | 2.04                    | 1.75                           | 1.16                                 | 1.12                         |
| 37                 | 1.70                     | 2.03                    | 1.91                           | 1.13                                 | 1.28                         |
| 36                 | 1.80                     | 2.22                    | 2.07                           | 1.13                                 | 1.11                         |
| 35                 | 1.72                     | 2.09                    | 2.01                           | 1.06                                 | 1.14                         |
| 34                 | 1.76                     | 2.26                    | 2.00                           | 1.04                                 | 1.02                         |
| 33                 | 1.81                     | 2.33                    | 1.93                           | 1.26                                 | 1.00                         |
| 32                 | 1.85                     | 2.20                    | 2.20                           | 1.18                                 | 1.02                         |
| 31                 | 1.81                     | 2.47                    | 1.87                           | 1.20                                 | 1.05                         |
| 30                 | 1.92                     | 2.30                    | 2.18                           | 1.34                                 | 1.14                         |
| 29                 | 1.90                     | 2.52                    | 2.00                           | 1.18                                 | 1.35                         |
| 28                 | 1.91                     | 2.58                    | 2.14                           | 1.01                                 | 1.12                         |
| 27                 | 1.98                     | 2.57                    | 2.16                           | 1.26                                 | 1.28                         |
| 26                 | 2.01                     | 2.71                    | 2.20                           | 1.18                                 | 1.16                         |
| 25                 | 2.07                     | 2.75                    | 2.30                           | 1.21                                 | 1.18                         |
| 24                 | 2.20                     | 3.02                    | 2.33                           | 1.25                                 | 1.60                         |
| 23                 | 2.23                     | 3.04                    | 2.48                           | 1.22                                 | 1.19                         |
| 22                 | 2.21                     | 2.96                    | 2.37                           | 1.31                                 | 1.54                         |
| 21                 | 2.42                     | 3.38                    | 2.54                           | 1.45                                 | 1.32                         |
| 20                 | 2.40                     | 3.25                    | 2.66                           | 1.31                                 | 1.46                         |
| 19                 | 2.61                     | 3.46                    | 2.87                           | 1.53                                 | 1.63                         |
| 18                 | 2.67                     | 3.67                    | 2.89                           | 1.53                                 | 1.58                         |
| 17                 | 2.72                     | 3.64                    | 3.01                           | 1.57                                 | 1.63                         |
| 16                 | 2.90                     | 4.25                    | 3.02                           | 1.50                                 | 1.70                         |
| 15                 | 3.04                     | 4.39                    | 3.17                           | 1.70                                 | 1.67                         |
| 14                 | 3.21                     | 4.78                    | 3.31                           | 1.68                                 | 1.75                         |
| 13                 | 3.34                     | 5.02                    | 3.40                           | 1.66                                 | 2.09                         |
| 12                 | 3.62                     | 5.47                    | 3.60                           | 1.94                                 | 2.16                         |
| 11                 | 3.80                     | 5.81                    | 3.81                           | 1.98                                 | 1.98                         |
| 10                 | 4.12                     | 6.29                    | 4.09                           | 2.17                                 | 2.28                         |



| Weeks before death | Illness trajectory       |                         |                                |                                      |                              |
|--------------------|--------------------------|-------------------------|--------------------------------|--------------------------------------|------------------------------|
|                    | Overall (%)<br>N= 77 315 | Cancer (%)<br>N= 23 213 | Organ failure (%)<br>N= 28 338 | Prolonged dwindling (%)<br>N= 20 064 | Sudden death (%)<br>N= 5 700 |
| 9                  | 4.37                     | 6.55                    | 4.36                           | 2.34                                 | 2.67                         |
| 8                  | 4.72                     | 7.02                    | 4.76                           | 2.62                                 | 2.54                         |
| 7                  | 5.29                     | 7.91                    | 5.29                           | 2.90                                 | 2.96                         |
| 6                  | 5.89                     | 8.92                    | 5.91                           | 3.15                                 | 3.04                         |
| 5                  | 6.87                     | 10.25                   | 6.70                           | 3.93                                 | 4.30                         |
| 4                  | 7.68                     | 10.93                   | 7.77                           | 4.53                                 | 5.02                         |
| 3                  | 9.19                     | 12.16                   | 9.97                           | 5.19                                 | 7.30                         |
| 2                  | 11.74                    | 13.32                   | 14.22                          | 6.76                                 | 10.53                        |
| 1                  | 17.96                    | 14.22                   | 24.48                          | 9.40                                 | 30.95                        |

***eTable 11. Frequency of trajectories distribution after removing decedents with potentially unexpected cause of death compared to the study population***

|                     | Overall | Decedents with potentially unexpected cause of death excluded |      |
|---------------------|---------|---------------------------------------------------------------|------|
|                     |         | N                                                             | %    |
| <b>Overall</b>      | 77 315  | 42 760                                                        | 55.3 |
| <b>Trajectories</b> |         |                                                               |      |
| Cancer              | 23 213  | 17 305                                                        | 74.6 |
| Organ failure       | 28 338  | 12 844                                                        | 45.3 |
| Prolonged dwindling | 20 064  | 11 437                                                        | 57.0 |
| Sudden death        | 5 700   | 1 174                                                         | 20.6 |

***eTable 12. Incidence rate of unplanned hospitalisation during the last year of life by illness trajectory and rate ratios compared to the overall population, decedents with potentially unexpected cause of death are removed***

|                            | No.<br>decedents | Unplanned<br>hospitalisation |      | Number of<br>person-years | Incidence rate<br>per 100<br>person-years | Incidence rate ratio <sup>a</sup> |                       |
|----------------------------|------------------|------------------------------|------|---------------------------|-------------------------------------------|-----------------------------------|-----------------------|
|                            |                  | No. events                   | Mean |                           |                                           | Unadjusted                        | Adjusted <sup>b</sup> |
| <b>Overall<sup>c</sup></b> | 42 760           | 73 108                       | 1.71 | 40 413                    | 180.9                                     | 1.0 (Ref)                         | 1.0 (Ref)             |
| <b>Trajectories</b>        |                  |                              |      |                           |                                           |                                   |                       |
| Cancer                     | 17 305           | 36 898                       | 2.13 | 15 961                    | 231.2                                     | 1.18 (1.16-1.2)                   | 1.13 (1.12-1.15)      |
| Organ failure              | 12 844           | 25 518                       | 1.99 | 12 119                    | 210.6                                     | 1.12 (1.1-1.15)                   | 1.09 (1.06-1.11)      |
| Prolonged dwindling        | 11 437           | 9 312                        | 0.81 | 11 196                    | 83.2                                      | 0.46 (0.45-0.48)                  | 0.57 (0.56-0.59)      |
| Sudden death               | 1 174            | 1 380                        | 1.18 | 1 136                     | 121.4                                     | 0.65 (0.61-0.7)                   | 0.73 (0.69-0.78)      |

*a: Robust standard errors were used to estimate the confidence intervals; incidence rate ratio obtained from zero-inflated Poisson models*

*b: Adjusted for sex, age, education, marital status, frailty, number of chronic diseases, polypharmacy; Decedents with missing education variable information (1.95 % of total number of decedents without unexpected cause of death) were excluded from the adjusted analysis.*

*c: The total study population was used as the reference category to compare the risks across illness trajectories to the average risk in the cohort.*

***eTable 13. Crude Incidence rate of unplanned hospitalisation by week, stratified by illness trajectories in the last year of life, decedents with potentially unexpected cause of death are removed***

| Weeks before death | Incidence Rate per 100 Patient weeks |        |               |                     |              |
|--------------------|--------------------------------------|--------|---------------|---------------------|--------------|
|                    | Overall                              | Cancer | Organ failure | Prolonged dwindling | Sudden death |
| 52                 | 1.5                                  | 1.6    | 2.0           | 1.1                 | 1.0          |
| 51                 | 1.5                                  | 1.7    | 1.8           | 1.1                 | 0.7          |
| 50                 | 1.6                                  | 1.7    | 1.9           | 1.0                 | 1.0          |
| 49                 | 1.5                                  | 1.5    | 2.0           | 1.0                 | 1.4          |
| 48                 | 1.6                                  | 1.7    | 2.2           | 1.0                 | 0.8          |
| 47                 | 1.5                                  | 1.7    | 1.9           | 0.9                 | 0.8          |
| 46                 | 1.6                                  | 1.7    | 2.0           | 0.9                 | 1.3          |
| 45                 | 1.7                                  | 1.8    | 2.1           | 0.9                 | 1.0          |
| 44                 | 1.7                                  | 1.9    | 2.0           | 1.0                 | 0.8          |
| 43                 | 1.6                                  | 1.8    | 1.9           | 1.0                 | 1.2          |
| 42                 | 1.8                                  | 2.0    | 2.4           | 1.0                 | 0.8          |
| 41                 | 1.8                                  | 2.1    | 2.1           | 1.0                 | 1.0          |
| 40                 | 1.9                                  | 2.2    | 2.2           | 1.0                 | 1.4          |
| 39                 | 1.9                                  | 2.2    | 2.2           | 1.1                 | 1.6          |
| 38                 | 1.9                                  | 2.2    | 2.1           | 1.2                 | 1.1          |
| 37                 | 1.8                                  | 2.2    | 2.1           | 1.0                 | 1.1          |
| 36                 | 2.0                                  | 2.3    | 2.4           | 1.1                 | 1.3          |
| 35                 | 1.9                                  | 2.2    | 2.2           | 1.0                 | 1.6          |
| 34                 | 2.0                                  | 2.4    | 2.4           | 1.0                 | 0.9          |
| 33                 | 2.0                                  | 2.5    | 2.3           | 1.1                 | 1.1          |
| 32                 | 2.0                                  | 2.3    | 2.6           | 1.1                 | 1.7          |
| 31                 | 2.1                                  | 2.6    | 2.3           | 1.2                 | 1.6          |
| 30                 | 2.1                                  | 2.5    | 2.5           | 1.3                 | 1.4          |
| 29                 | 2.1                                  | 2.8    | 2.3           | 1.0                 | 1.4          |
| 28                 | 2.1                                  | 2.7    | 2.5           | 1.0                 | 1.1          |
| 27                 | 2.2                                  | 2.7    | 2.6           | 1.1                 | 1.1          |
| 26                 | 2.3                                  | 2.9    | 2.6           | 1.1                 | 1.0          |
| 25                 | 2.4                                  | 3.0    | 2.7           | 1.2                 | 1.2          |
| 24                 | 2.5                                  | 3.3    | 2.7           | 1.2                 | 1.9          |
| 23                 | 2.5                                  | 3.1    | 3.0           | 1.1                 | 1.2          |
| 22                 | 2.5                                  | 3.3    | 2.9           | 1.2                 | 1.7          |
| 21                 | 2.7                                  | 3.6    | 3.0           | 1.3                 | 1.3          |
| 20                 | 2.7                                  | 3.5    | 3.0           | 1.2                 | 1.6          |
| 19                 | 3.0                                  | 3.8    | 3.5           | 1.5                 | 2.1          |
| 18                 | 3.1                                  | 4.1    | 3.4           | 1.4                 | 1.8          |
| 17                 | 3.2                                  | 4.0    | 3.7           | 1.5                 | 2.3          |
| 16                 | 3.5                                  | 4.8    | 3.8           | 1.5                 | 1.5          |
| 15                 | 3.6                                  | 4.8    | 3.9           | 1.6                 | 1.6          |
| 14                 | 3.8                                  | 5.4    | 4.0           | 1.5                 | 2.2          |

| Weeks before death | Incidence Rate per 100 Patient weeks |        |               |                     |              |
|--------------------|--------------------------------------|--------|---------------|---------------------|--------------|
|                    | Overall                              | Cancer | Organ failure | Prolonged dwindling | Sudden death |
| 13                 | 4.0                                  | 5.7    | 4.2           | 1.6                 | 2.0          |
| 12                 | 4.3                                  | 6.4    | 4.2           | 1.9                 | 1.8          |
| 11                 | 4.7                                  | 6.9    | 4.8           | 1.8                 | 2.5          |
| 10                 | 5.1                                  | 7.5    | 5.0           | 2.0                 | 2.3          |
| 9                  | 5.3                                  | 7.8    | 5.2           | 2.2                 | 3.2          |
| 8                  | 5.9                                  | 8.7    | 5.9           | 2.4                 | 2.5          |
| 7                  | 6.5                                  | 9.7    | 6.4           | 2.7                 | 2.7          |
| 6                  | 7.6                                  | 11.4   | 7.8           | 3.0                 | 2.8          |
| 5                  | 8.6                                  | 13.4   | 8.2           | 3.3                 | 4.3          |
| 4                  | 9.6                                  | 14.8   | 9.4           | 3.8                 | 5.4          |
| 3                  | 11.0                                 | 16.7   | 11.9          | 4.1                 | 7.9          |
| 2                  | 13.6                                 | 18.5   | 18.1          | 4.6                 | 9.5          |
| 1                  | 19.1                                 | 18.8   | 35.0          | 5.5                 | 29.8         |

***eTable 14. Zero-inflated Poisson versus Poisson models' incidence rate ratios of unplanned hospitalisation by illness trajectory compared to the overall population***

|                                     | Adjusted incidence rate ratio <sup>a</sup> |                  |
|-------------------------------------|--------------------------------------------|------------------|
|                                     | ZIP model <sup>b</sup>                     | Poisson model    |
| <b>Overall<sup>c</sup></b>          | 1.0 (Ref)                                  | 1.0 (Ref)        |
| <b>Trajectories</b>                 |                                            |                  |
| Cancer                              | 1.2 (1.18-1.21)                            | 1.24 (1.23-1.26) |
| Organ failure                       | 1.04 (1.03-1.06)                           | 1.05 (1.03-1.06) |
| Prolonged dwindling                 | 0.66 (0.65-0.68)                           | 0.65 (0.64-0.67) |
| Sudden death                        | 0.79 (0.77-0.82)                           | 0.8 (0.77-0.82)  |
| <b>Akaike information criterion</b> | 539 677                                    | 546 423          |

*a: Adjusted for sex, age, education, marital status, frailty, number of chronic diseases, polypharmacy; Decedents with missing education variable information (2.1% of total) were excluded from the analysis; Robust standard errors were used to estimate the confidence intervals*

*b: Zero-inflated Poisson regression*

*c: The total study population was used as the reference category to compare the risks across illness trajectories to the average risk in the cohort.*

*eFigure 1. Illustration of the study design*

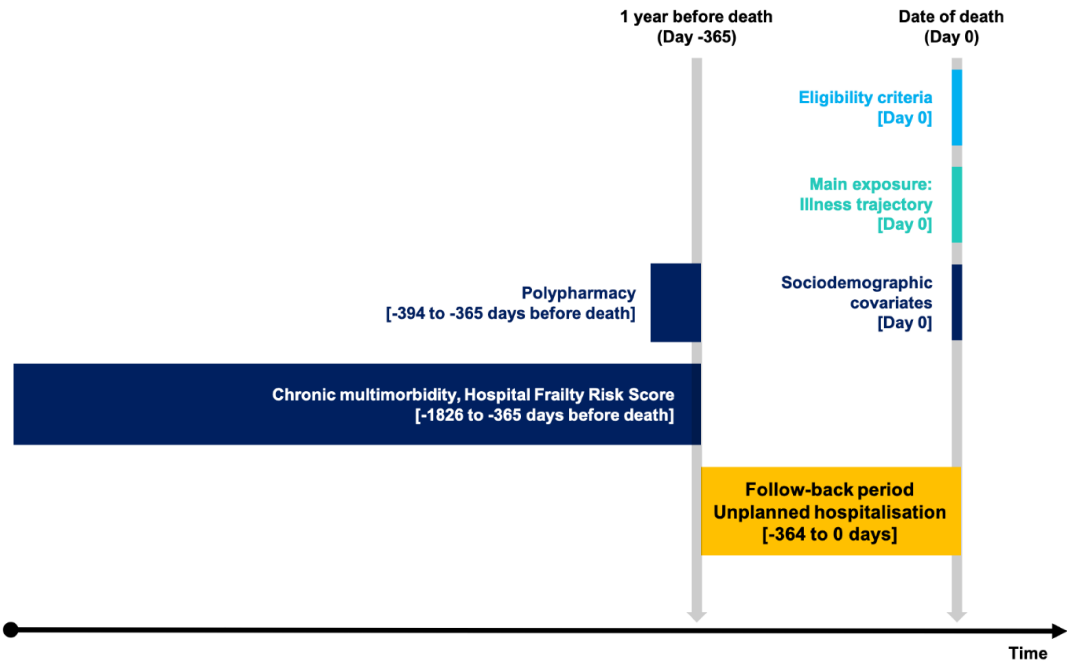

**eFigure 2. Normal quintiles-quintiles plot of the number of unplanned admission throughout the entire last year of life**

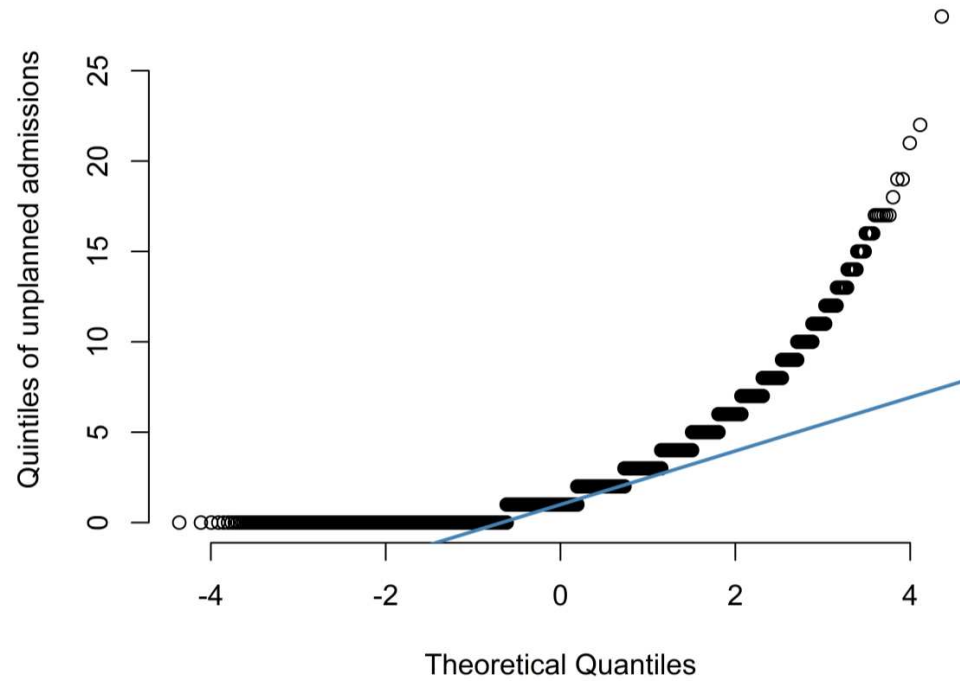



***eFigure 3. Fitted probabilities under Zero-inflated Poisson and Poisson models plotted against each other***

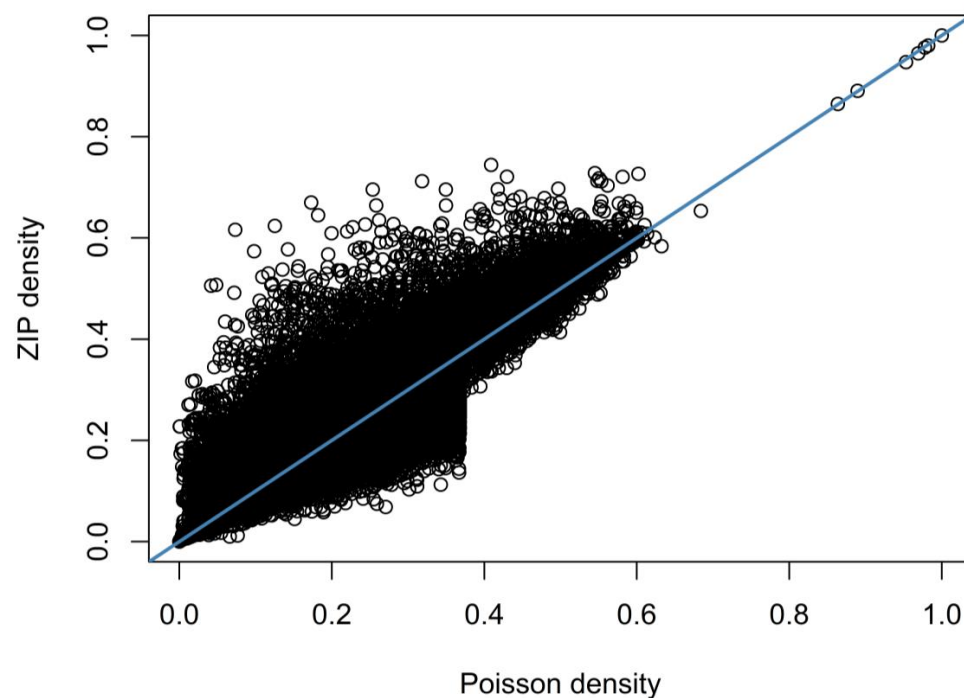

*eFigure 4. Flowchart diagram*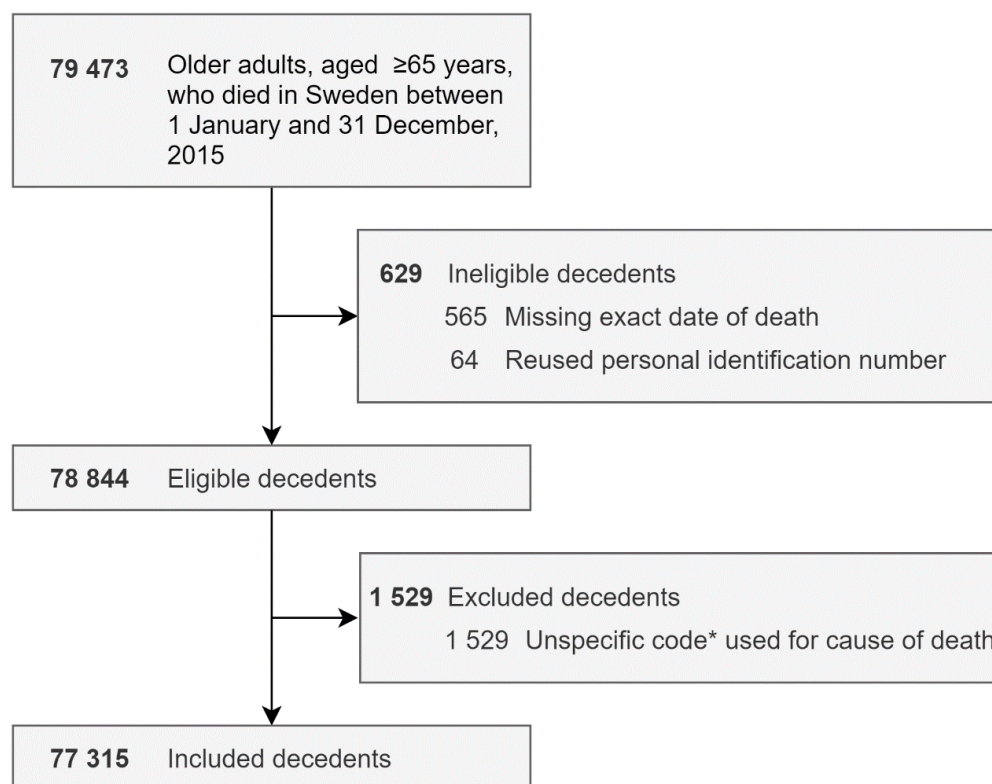

\*Unspecific ICD-10 codes are B99, R96, R98, and R99

**eFigure 5. Incidence rate of unplanned hospitalisation by week, stratified by illness trajectories in the last year of life, sex- and age-standardised (direct standardization).**

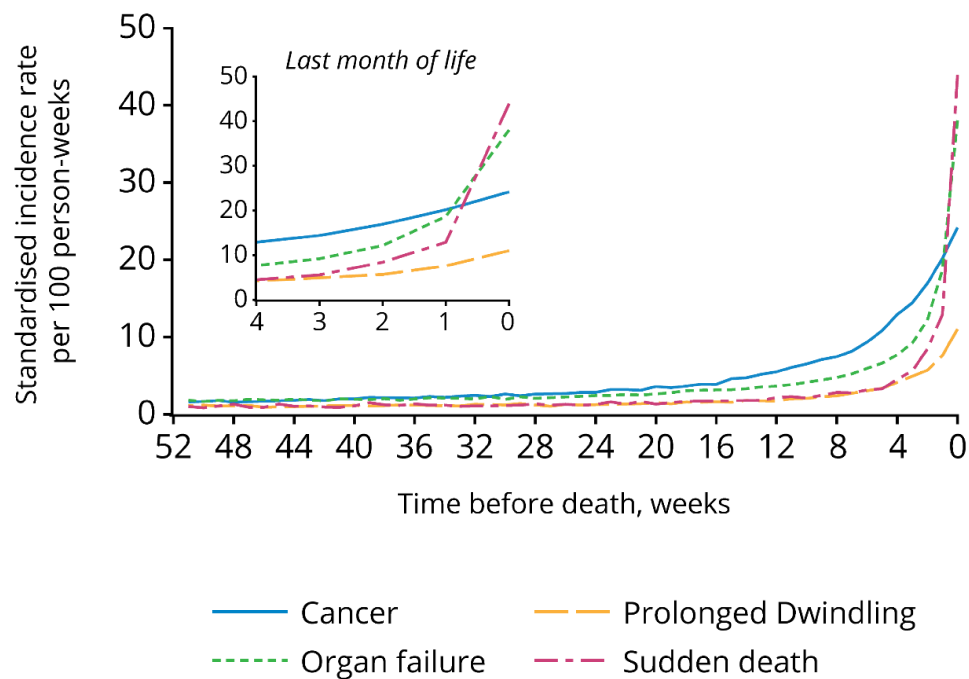

**eFigure 6. Crude Incidence rate of unplanned hospitalisation by week, stratified by illness trajectories in the last year of life, decedents with potentially unexpected cause of death are removed**

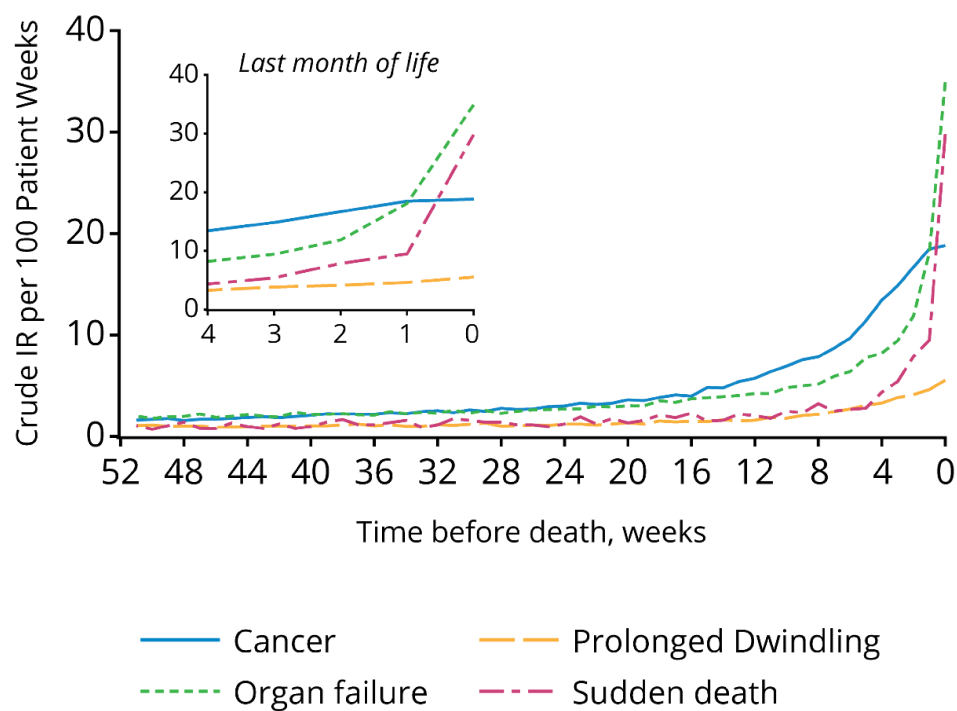

Supplement: bmjspcare-2020-002778supp001_data_supplement.pdf [file bmjspcare-2020-002778supp001_data_supplement.pdf]
